# Supplementary material for: Cultivar and Tree Density As Key Factors in the Long-Term Performance of Super High-Density Olive Orchards
Source: PubMed Central journal article supplement (PMC4993835; doi:10.3389/fpls.2016.01226), 2016-08-23
Supplement: DataSheet1.pdf [file DataSheet1.pdf]

## Supplementary Material

# Cultivar and tree density as key factors in the long-term performance of super high-density olive orchards

Concepción M. Díez\*, Juan Moral\*, Diego Cabello, Pablo Morello, Luis Rallo, and Diego Barranco

- Correspondence: [cmdiez@uco.es](mailto:cmdiez@uco.es) and [jmoral@ucdavis.edu](mailto:jmoral@ucdavis.edu)

## 1 Supplementary Figures

.

### 1.1 Supplementary Figures

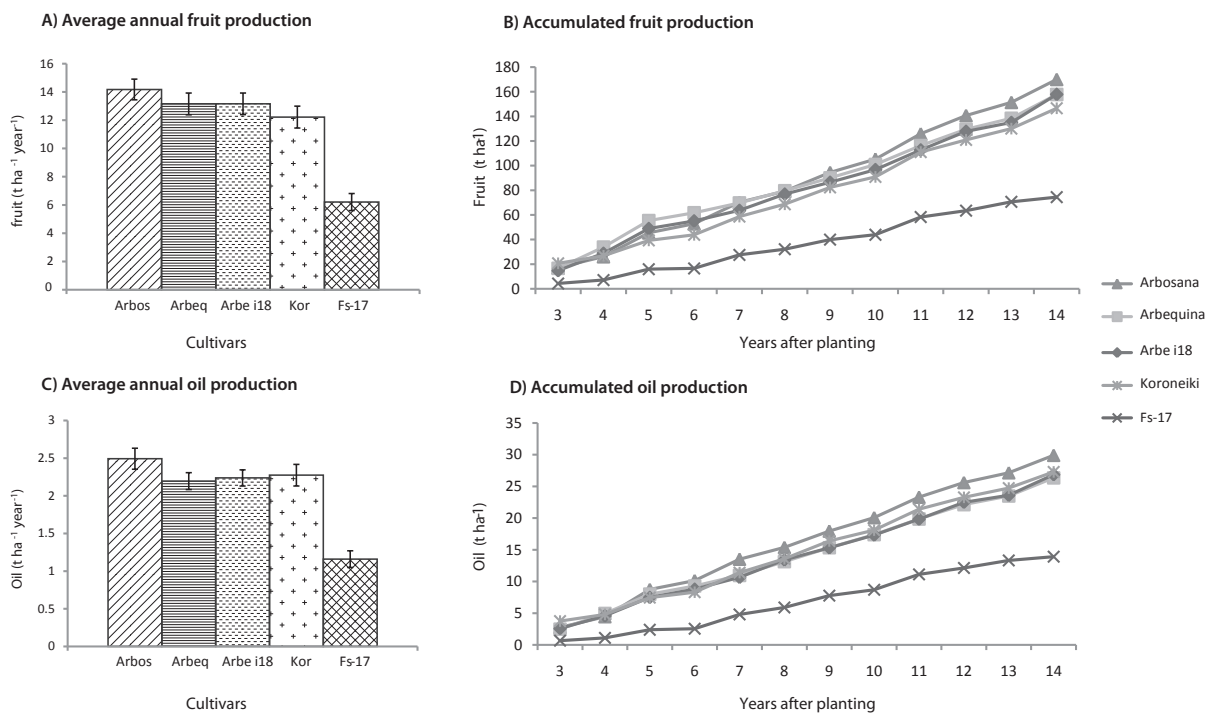

**Supplementary Figure 1.** Average annual and accumulated fruit and oil production for the five evaluated olive cultivars at 1975 trees ha<sup>-1</sup> 14 years after planting.

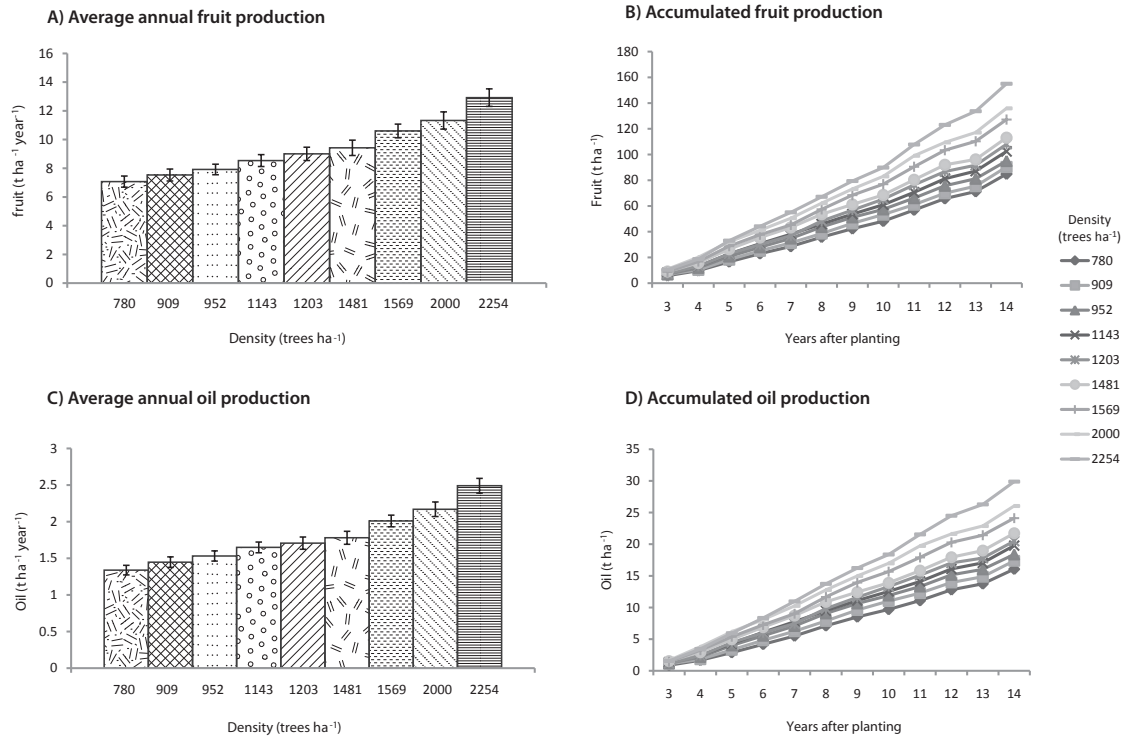

**Supplementary Figure 2.** Average annual and accumulated fruit and oil production per tree density for the cultivar ‘Arbequina’ 14 years after planting. Nine tree densities ranging from 780 to 2254 trees ha<sup>-1</sup> were evaluated in this study.

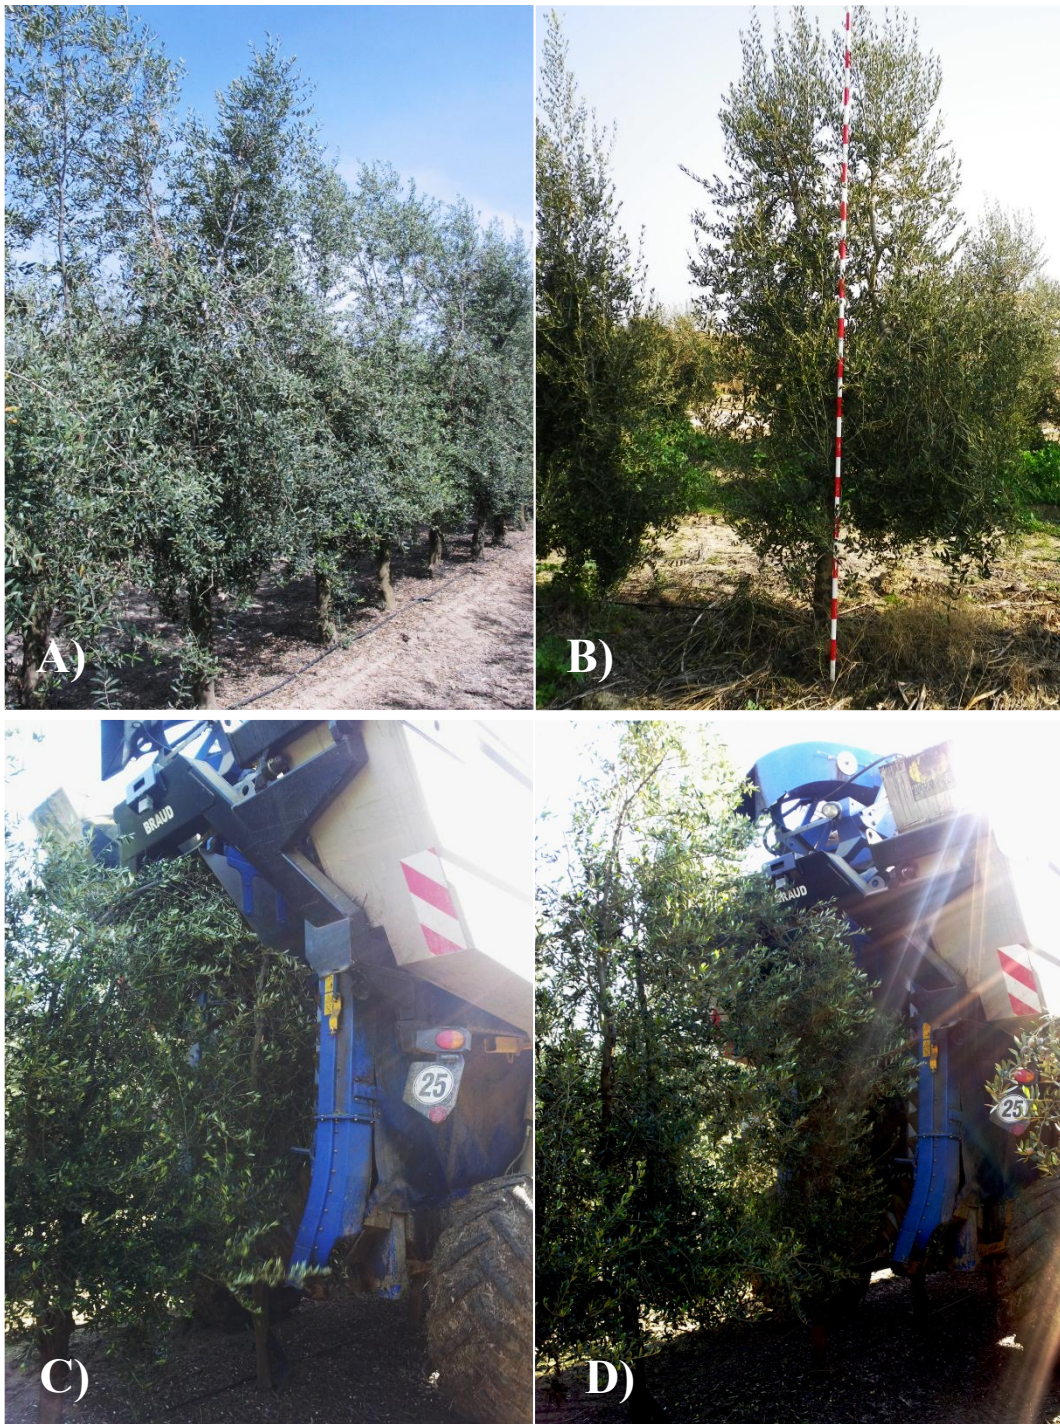

**Supplementary Figure 3.** **A)** General view of the ‘Arbequina’ hedgerow at 1975 trees  $\text{ha}^{-1}$ . **B)** ‘Arbequina’ tree at 909 trees/  $\text{ha}^{-1}$ ; the tree height for all the treatments was above 3.5 m (every band of the ranging pole measures 10 cm). However, the top branches were flexible (**C**) and therefore, they were not damaged by the straddle harvester, which worked at 2.6 m height (**D**).
